# Supplementary material
Source: Springer Nature journal article supplement (https://www.springermedizin.de/resource/supplementary/12943_2013_1160_MOESM2_ESM.pdf/9552616)

**a**

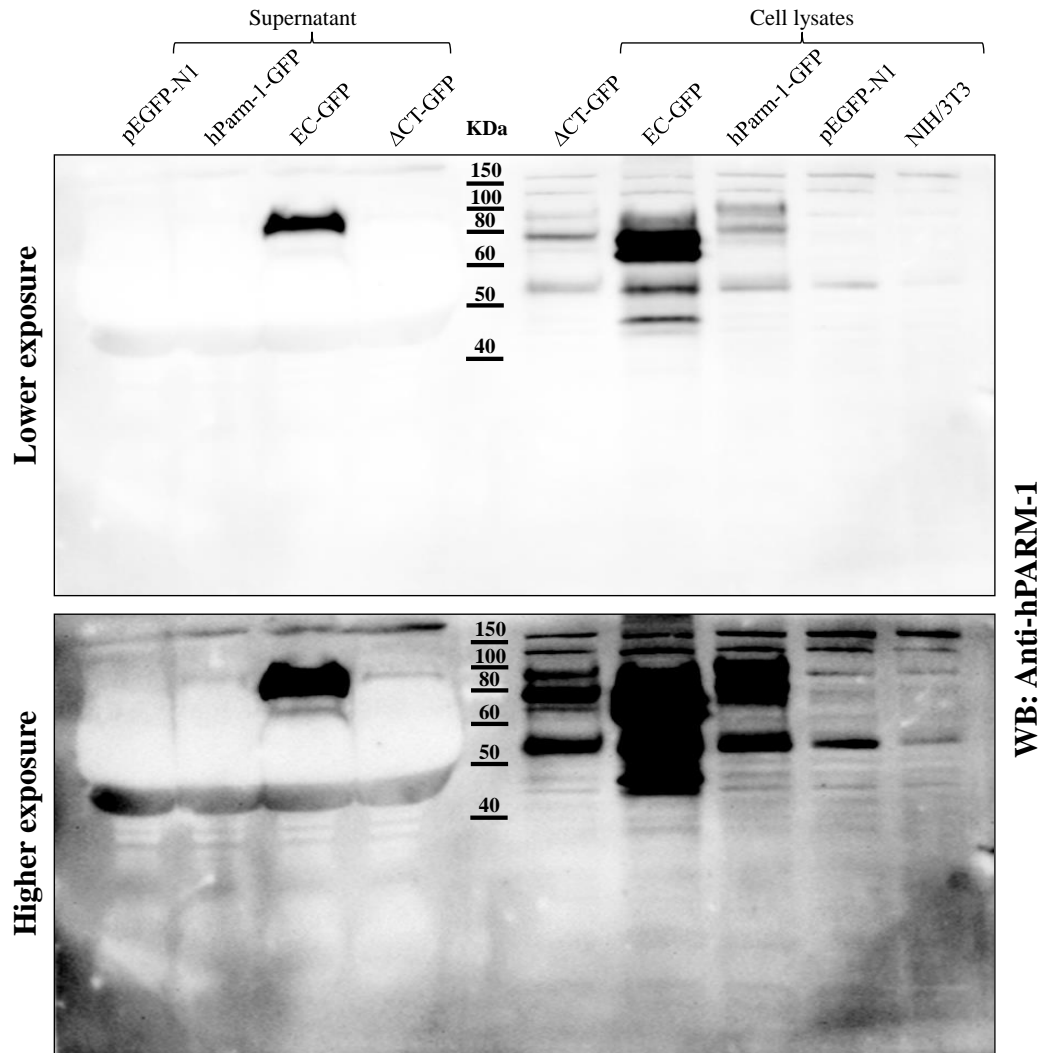

**b**

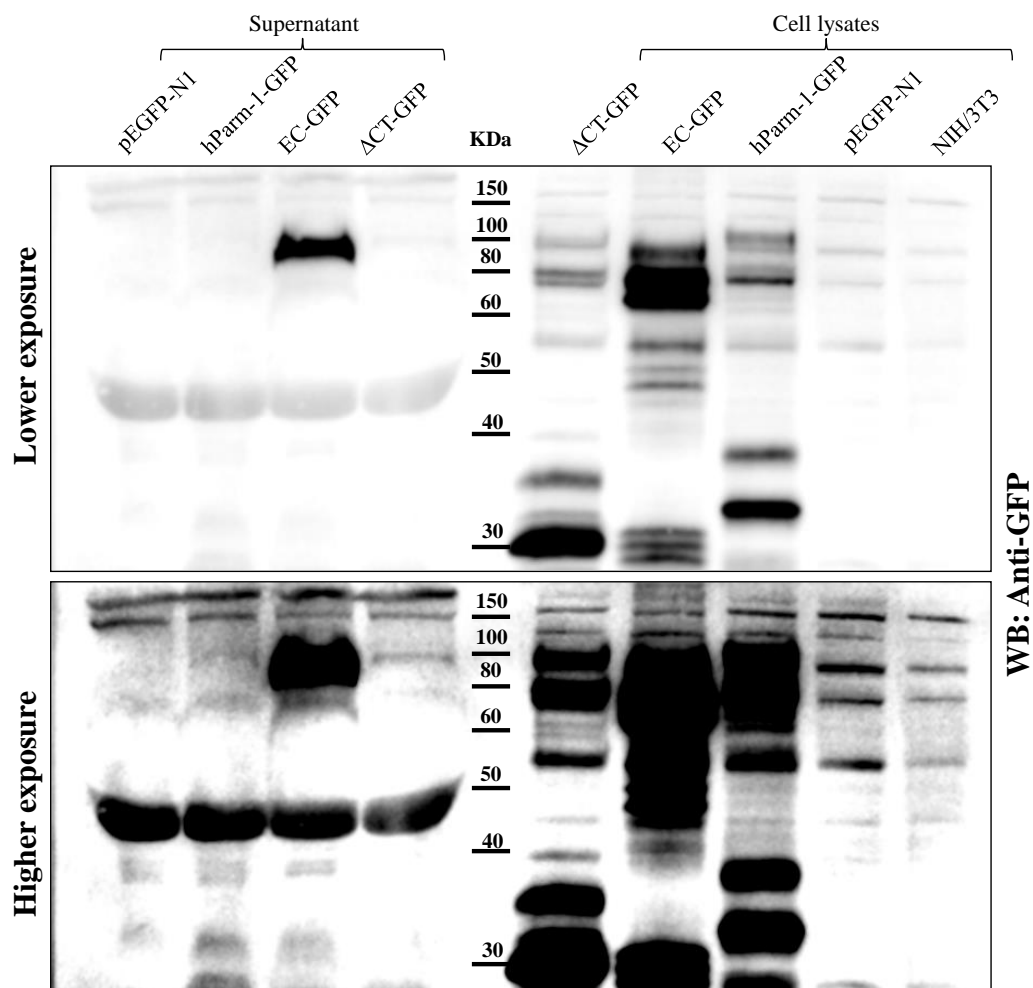

Supplement: MOESM2 [file 9552616]
